# Supplementary material for: Valorization of polycaprolactone for the production of nylon-6 monomers
Source: Royal Society of Chemistry journal article supplement (doi:10.1039/d3gc05118h), 2024-01-01
Supplement: d3gc05118h1.pdf [file d3gc05118h1.pdf]

## Supporting Information

### Valorization of polycaprolactone for production of nylon-6 monomers

Hui Zhang<sup>a,b</sup>, Yanfei Zhao\*<sup>a,b</sup>, Yusi Wang<sup>a,b</sup>, Rongxiang Li<sup>a,b</sup>, Minhao Tang<sup>a,b</sup>, Wei Zeng<sup>a,b</sup>, Ying Wang<sup>a,b</sup>, Xiaoqian Chang<sup>a,b</sup>, Buxing Han<sup>a,b</sup> and Zhimin Liu<sup>\*a,b</sup>

<sup>a</sup> *Beijing National Laboratory for Molecular Sciences (BNLMS), CAS Key Laboratory of Colloid, Interface and Chemical Thermodynamics, CAS Research/Education Center for Excellence in Molecular Sciences, Institute of Chemistry, Chinese Academy of Sciences, Beijing 100190, P. R. China.*

*E-mail: [lianyi302@iccas.ac.cn](mailto:lianyi302@iccas.ac.cn), [liuzm@iccas.ac.cn](mailto:liuzm@iccas.ac.cn)*

<sup>b</sup> *University of Chinese Academy of Sciences, Beijing 100049, P. R. China.*

## Methods

### 1. Chemicals

6-Aminocaproic acid (99%), s-trioxane (99%), cerium (IV) oxide ( $\text{CeO}_2$ , 99.9%), zirconium (IV) oxide ( $\text{ZrO}_2$ , 99%), ruthenium on carbon (Ru/C, 5 wt.% Ru) and cerium chloride ( $\text{CeCl}_3$ , 99.9%) were supplied by J&k Scientific Ltd. Ruthenium chloride hydrate ( $\text{RuCl}_3 \cdot x\text{H}_2\text{O}$ , 99%, Ru37-40%), caprolactam (99%),  $\beta$ -hydroxy-isovaleric acid (>96%), platinum on activated carbon (Pt/C, 5% wt.% Pt), palladium on carbon (Pd/C, 5 wt.% Pd), deuterated aqueous ammonia ( $\text{ND}_3 \cdot \text{D}_2\text{O}$ , 25 wt.%) graphene oxide (GO, >99%), 6-hydroxyhexanoic acid ( $\geq 95\%$ ), ruthenium on aluminum oxide (Ru/ $\text{Al}_2\text{O}_3$ , 5 wt.% Ru), sodium hydroxide (NaOH, 99%), titanium dioxide nanoparticles ( $\text{TiO}_2$ , anatase, 99.8%), carbon nanotube (MWCNT, >95%) and silicon dioxide ( $\text{SiO}_2$ , 99.5%,  $15 \pm 5\text{nm}$ ) were supplied by Beijing Innochem Technology Co., Ltd. Polycaprolactone (Mn 45000, particle), poly( $\beta$ -hydroxybutyrate) (PHB,  $\geq 98\%$ , powder) and 6-aminohexanamide (99%) were supplied by Shanghai Macklin Biochemical Co., Ltd. 6-Hydroxyhexanamide ( $\geq 95\%$ ) was supplied by Shanghai Shaoyuan Co., Ltd. Niobium(V) oxide ( $\text{Nb}_2\text{O}_5$ , high purity reagent) was supplied by Sinopharm Chemical Reagent limited corporation. Aqueous ammonia ( $\text{NH}_3 \cdot \text{H}_2\text{O}$ , 25-28 wt.%) was supplied by Xilong Scientific Co., Ltd. All the above chemicals were used without further purification.

### 2. Catalysts Preparation

All the supported metal nanocatalysts were prepared by impregnation method in combination with subsequent reduction using  $\text{H}_2$ . In a typical experiment to prepare 5 wt.% Ru/ $\text{CeO}_2$ , 500 mg of  $\text{CeO}_2$  and 67.6 mg of  $\text{RuCl}_3 \cdot x\text{H}_2\text{O}$  were loaded into 2 mL of distilled water and stirred at room temperature for 6 h, which was then dried at  $60^\circ\text{C}$  overnight. Subsequently, the dried sample was treated under 10%  $\text{H}_2/\text{Ar}$  at  $200^\circ\text{C}$  for 5 h (ramp rate  $5^\circ\text{C}/\text{min}$ ) to obtain the desired catalyst Ru/ $\text{CeO}_2$ . The Ru loading of Ru/ $\text{CeO}_2$  was 3.9 wt.%, determined by inductively coupled plasma-optical emission spectrometer (ICP-OES). Similarly, other oxides ( $\text{ZrO}_2$ ,  $\text{Nb}_2\text{O}_5$ ,  $\text{TiO}_2$ ,  $\text{SiO}_2$ ) supported Ru catalysts were prepared via changing the supports.

In a typical experiment to synthesize 50 wt.%  $\text{CeO}_2/\text{RGO}$  composite, which was used as support to prepare Ru/ $\text{CeO}_2/\text{RGO}$  ternary catalyst, 40 mg of GO was dispersed in 50 mL of distilled water under the tip sonication for 10 min, and then 2 mL of  $\text{CeCl}_3$  aqueous solution was dropped into the GO dispersion under sonication within 2 min. Subsequently, 2 mL of NaOH aqueous solution with concentration 3 times higher than that of the  $\text{CeCl}_3$  used was dropped into the above suspension within 7 min. Finally, the resultant mixture was loaded into a Teflon-lined autoclave and kept at  $150^\circ\text{C}$  for 10 h. After the autoclave was cooled to room temperature, the solid sample was separated via centrifugation, washed with water for three times, and vacuum dried at  $60^\circ\text{C}$  overnight. Using the resultant  $\text{CeO}_2/\text{RGO}$  composite as the support, 5 wt.% Ru / $\text{CeO}_2/\text{RGO}$  ternary catalyst was also obtained by impregnation reduction.

### 3. Evaluation of Catalytic Performance

All reactions were performed in a Teflon-lined stainless-steel autoclave (16 mL of the inner volume) equipped with a magnetic stirrer. In a typical experiment, PCL (1 mmol based on the structural unit),  $\text{NH}_3 \cdot \text{H}_2\text{O}$  (25-28 wt.%, 3 mL) and catalyst (50 mg, metal/PCL monomer molar ratio 0.02) were successively loaded into the autoclave in a glove box under  $\text{N}_2$ , and then the autoclave was sealed. Subsequently, the autoclave was moved to an air-bath set at a desired temperature. After reaction, the autoclave was cooled down in an ice water. The catalyst was separated from the reaction system by centrifugation, and the products were then collected via removing aqueous ammonia from the reaction solution by vacuum-rotary evaporation at  $60^\circ\text{C}$ . The quantitative analysis of the products was conducted by  $^1\text{H}$  NMR spectroscopy using s-trioxane as an internal standard and  $\text{D}_2\text{O}$  as solvent.

#### NMR measurements:

NMR spectra were recorded on Bruker Avance III 400 HD spectrometer equipped with 5 mm pulsed-field-

gradient (PFG) probes. Chemical shifts are given in ppm relative to D<sub>2</sub>O or s-trioxane.

For <sup>1</sup>H and <sup>13</sup>C NMR analysis, products were dissolved in D<sub>2</sub>O and were recorded on Bruker Avance III 400 HD.

**Specific calculations are as follows:**

$$Yield_i = \frac{Collected\ Product_i(mol)}{theoretical\ Product_i(mol)} \times 100\%$$

$$Conversion = \frac{PCL(input) - PCL(residue)}{PCL(input)} \times 100\%$$

$$Selectivity_i = \frac{Product_i(mol)}{\sum Product(mol)} \times 100\%$$

$$Total\ Yield = \sum Yield$$

In most cases, there was no PCL left, and the recovered catalyst was determined to keep almost unchanged in mass, meaning its conversion is about 100%.

#### 4. Structural Characterization

X-ray diffraction (XRD) was carried out on an X-ray diffractometer (PANalytical, Empyrean, Holland) with Cu K $\alpha$  radiation, at a scan rate of 7°/min. The morphology of the catalysts was observed using a transmission electron microscope (TEM, JEM-2100F, JEOL, Japan). The ethanol-diluted sample suspension was dropped onto lacey support film for TEM observation. X-ray photoelectron spectroscopy (XPS) was performed on an X-ray Photoelectron spectrometer (ESCALAB250xl, VG, USA) using an Al-K $\alpha$  radiation source. The binding energy was calibrated by the C 1s peak at 284.8 eV. The Ru content of the catalyst was determined by Inductively Coupled Plasma-Optical Emission Spectrometer (Agilent 5800 VDV ICP-OES). The fresh Ru/CeO<sub>2</sub> (5.35 mg) was digested by aqua regia and inverse aqua regia at 150 °C and filtered by a microporous filtering film for ICP analysis. The Raman spectra were obtained on a HORIBA confocal laser Raman spectrometer (LabRAM HR Evolution, HORIBA) equipped with a 532 nm laser. The Raman spectra were recorded in the spectral range of 200-4000cm<sup>-1</sup>.

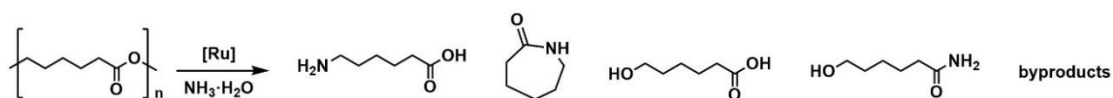

Scheme S1. Possible products of PCL depolymerization.

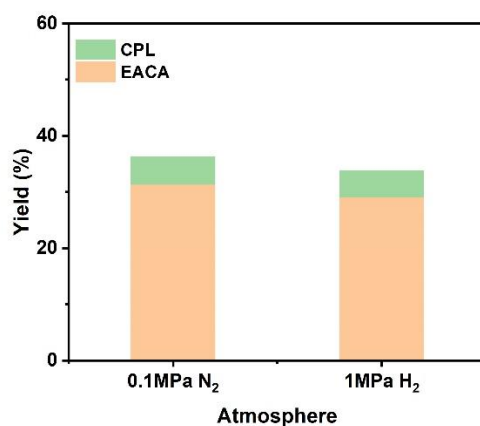

Figure S1. PCL depolymerization with Ru/CeO<sub>2</sub> under different atmosphere. Reaction conditions: PCL, 1 mmol; Ru/CeO<sub>2</sub>, 50 mg; NH<sub>3</sub>·H<sub>2</sub>O, 3 mL; 18h, 140 °C.

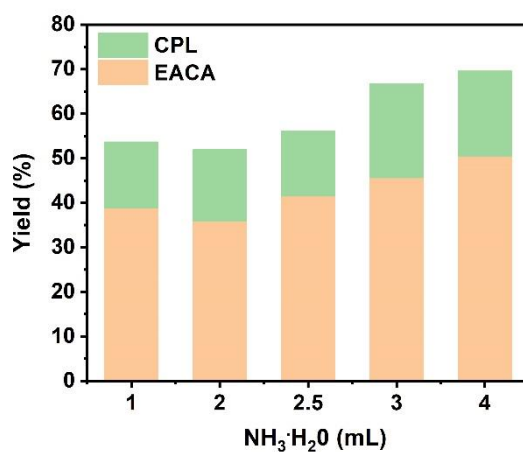

Figure S2. PCL depolymerization using different amount of NH<sub>3</sub>·H<sub>2</sub>O over Ru/CeO<sub>2</sub>. Reaction conditions: PCL, 1 mmol; Ru/CeO<sub>2</sub>, 50 mg; 18h, 160 °C.

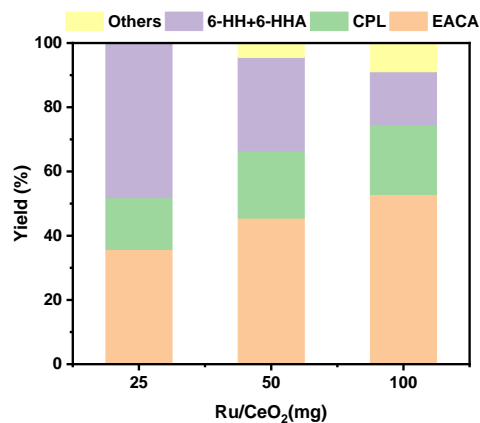

**Figure S3. PCL depolymerization over Ru/CeO<sub>2</sub> using different catalyst dosage.** Reaction conditions: PCL, 1 mmol; NH<sub>3</sub>·H<sub>2</sub>O, 3 mL; 18 h, 160 °C.

Note: The decarboxylation of 6-hydroxyhexanoic acid and 6-aminohexanoic acid could occur with high catalyst dosages at 160 °C.

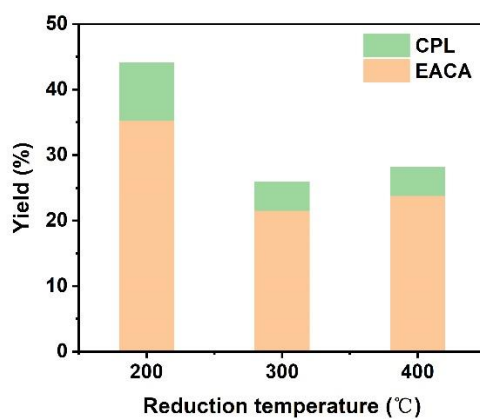

**Figure S4. PCL depolymerization over Ru/CeO<sub>2</sub> reduced at different temperatures.** Reaction conditions: PCL, 1 mmol; Ru/CeO<sub>2</sub>, 50 mg; NH<sub>3</sub>·H<sub>2</sub>O, 3 mL; 18 h, 140 °C.

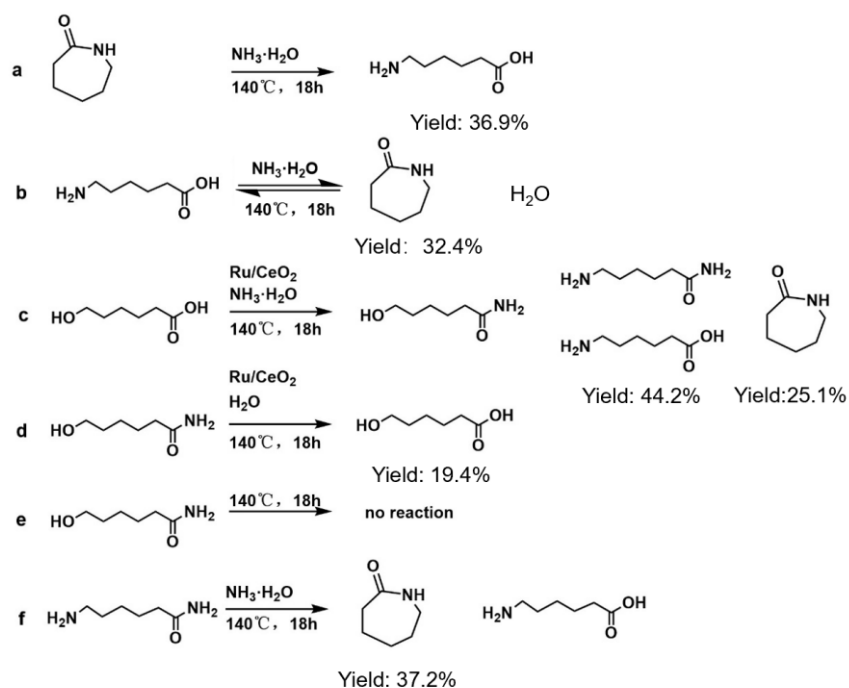

**Figure S5. Possible reactions involved in the PCL decomposition.** Reaction conditions: (a) caprolactam, 1 mmol;  $\text{NH}_3\cdot\text{H}_2\text{O}$ , 3 mL; 18 h, 140 °C. (b) 6-aminocaproic acid, 1mmol;  $\text{NH}_3\cdot\text{H}_2\text{O}$ , 3 mL; 18 h, 140 °C. (c) 6-hydroxyhexanoic acid, 1mmol;  $\text{Ru/CeO}_2$ , 50 mg;  $\text{NH}_3\cdot\text{H}_2\text{O}$ , 3 mL; 18 h, 140 °C. (d) 6-hydroxyhexanamide, 1mmol;  $\text{Ru/CeO}_2$ , 50 mg;  $\text{H}_2\text{O}$ , 3mL; 18 h, 140 °C. (e) 6-hydroxyhexanamide, 1mmol; 18 h, 140 °C. (f) 6-aminohexanamide, 0.12mmol;  $\text{NH}_3\cdot\text{H}_2\text{O}$ , 1 mL; 18 h, 140 °C.

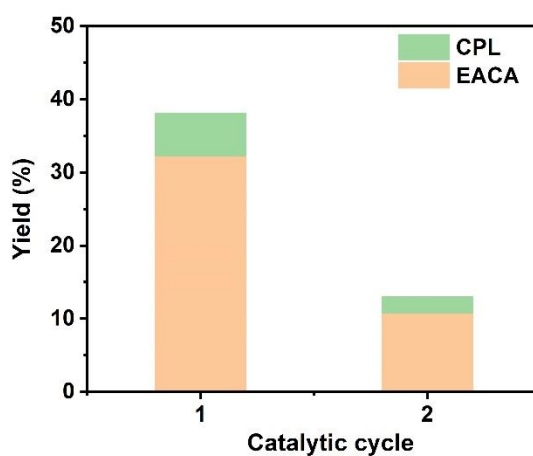

**Figure S6. Recycling experiment of Ru/CeO<sub>2</sub> as a catalyst for PCL degradation.** Reaction conditions: PCL, 1 mmol; Ru/CeO<sub>2</sub>, 50 mg; NH<sub>3</sub>·H<sub>2</sub>O, 3 mL; 140 °C, 18 h for each cycle. Note: The catalyst was separated from the reaction system by centrifugation and washed with water and ethanol for 3 times. After being dried under vacuum, the recovered catalyst was reused for the next run.

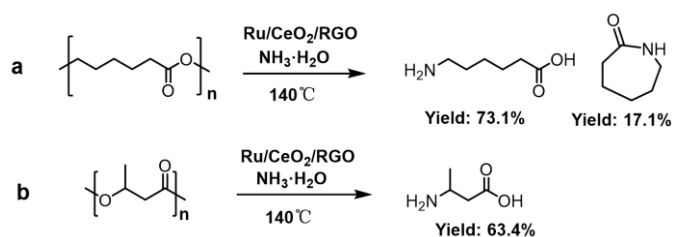

**Figure S7. (a) PCL degradation.** Reaction conditions: PCL, 0.2 mmol; Ru/CeO<sub>2</sub>/RGO, 10 mg; NH<sub>3</sub>·H<sub>2</sub>O, 1 mL; 140 °C, 144 h. **(b) PHB degradation.** Reaction conditions: PHB, 0.2 mmol; Ru/CeO<sub>2</sub>/RGO, 10 mg; NH<sub>3</sub>·H<sub>2</sub>O, 1 mL; 140 °C, 18 h.

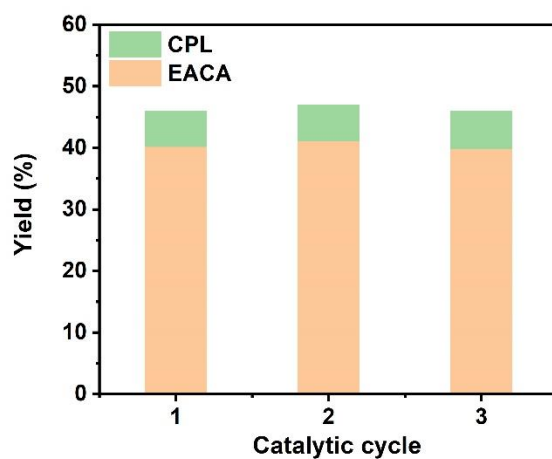

**Figure S8. Recycling experiments of Ru/CeO<sub>2</sub>/RGO as a catalyst for PCL degradation.** Reaction conditions: PCL, 0.2 mmol; Ru/CeO<sub>2</sub>/RGO, 10 mg; NH<sub>3</sub>·H<sub>2</sub>O, 1 mL; 140 °C, 18 h for each cycle. Note: The catalyst was separated from the reaction system by centrifugation and washed with water and ethanol for 3 times. After being dried under vacuum, the recovered catalyst was reused for the next run. It is clear that the catalyst remained its activity after reused for 3 times.

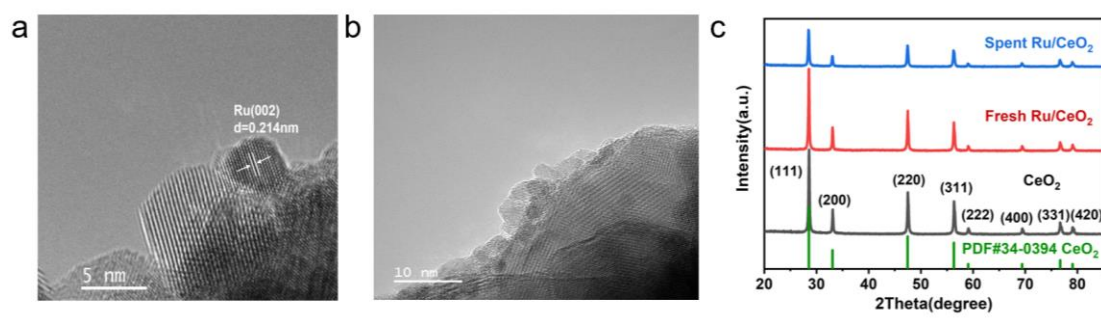

Figure S9. (a-b) TEM images of fresh Ru/CeO<sub>2</sub> catalyst. (c) XRD patterns of various samples.

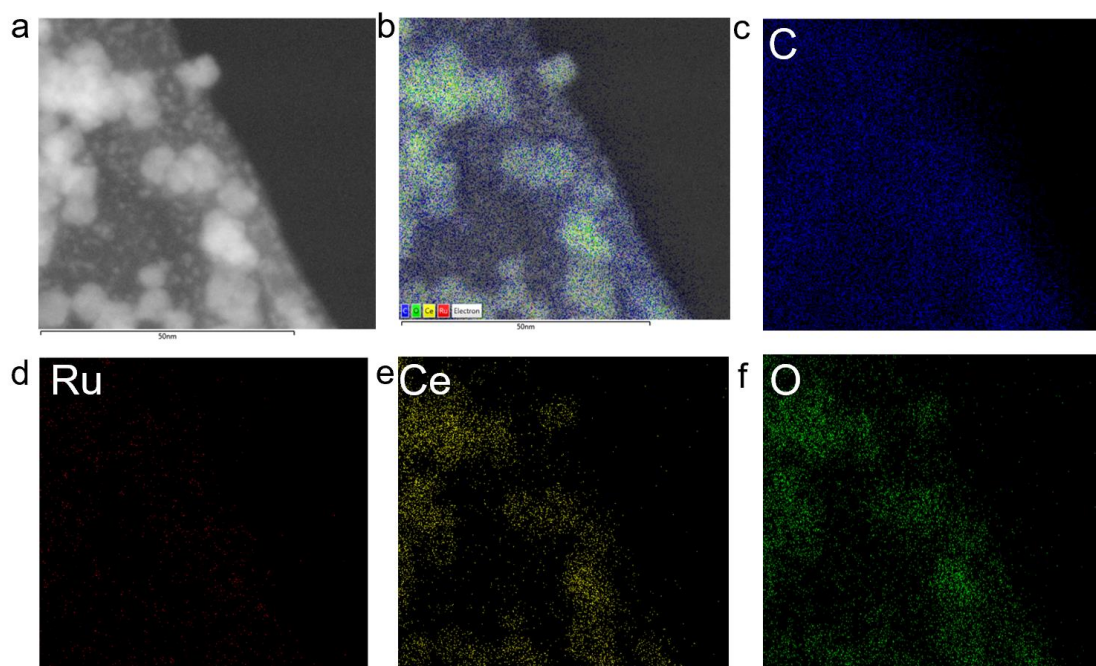

Figure S10. (a-f) EDS images (mapping) of the fresh Ru/CeO<sub>2</sub>/RGO catalyst.

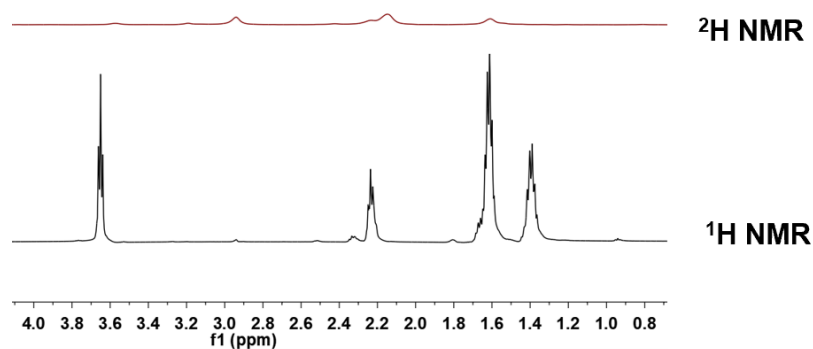

Figure S11. Amination experiment of PCL in ND<sub>3</sub>-D<sub>2</sub>O. Reaction conditions: PCL, 1 mmol; Ru/CeO<sub>2</sub>, 50 mg; ND<sub>3</sub>-D<sub>2</sub>O, 1 mL; 140 °C, 18 h. (<sup>2</sup>H NMR: H<sub>2</sub>O as solvent, <sup>1</sup>H NMR: D<sub>2</sub>O as solvent; room temperature).

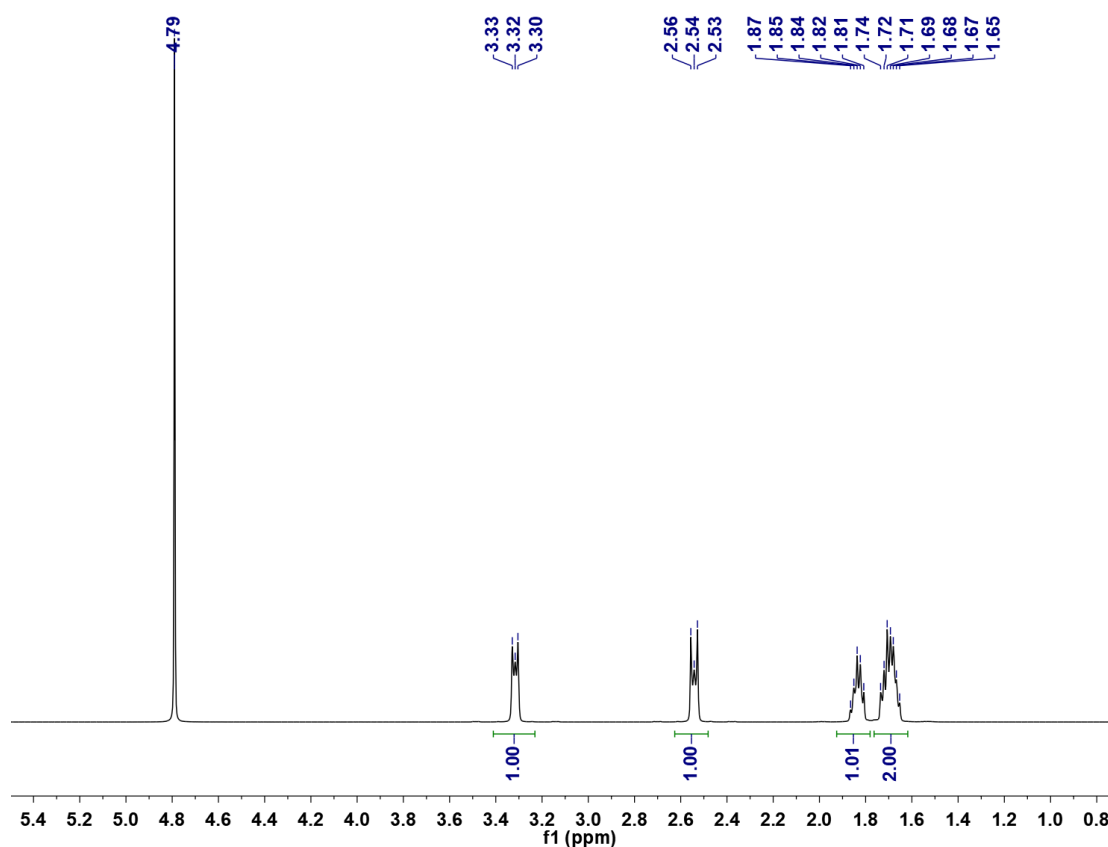

Figure S12. <sup>1</sup>H NMR spectrum of commercial caprolactam (D<sub>2</sub>O as solvent, 4.79 ppm; room temperature).

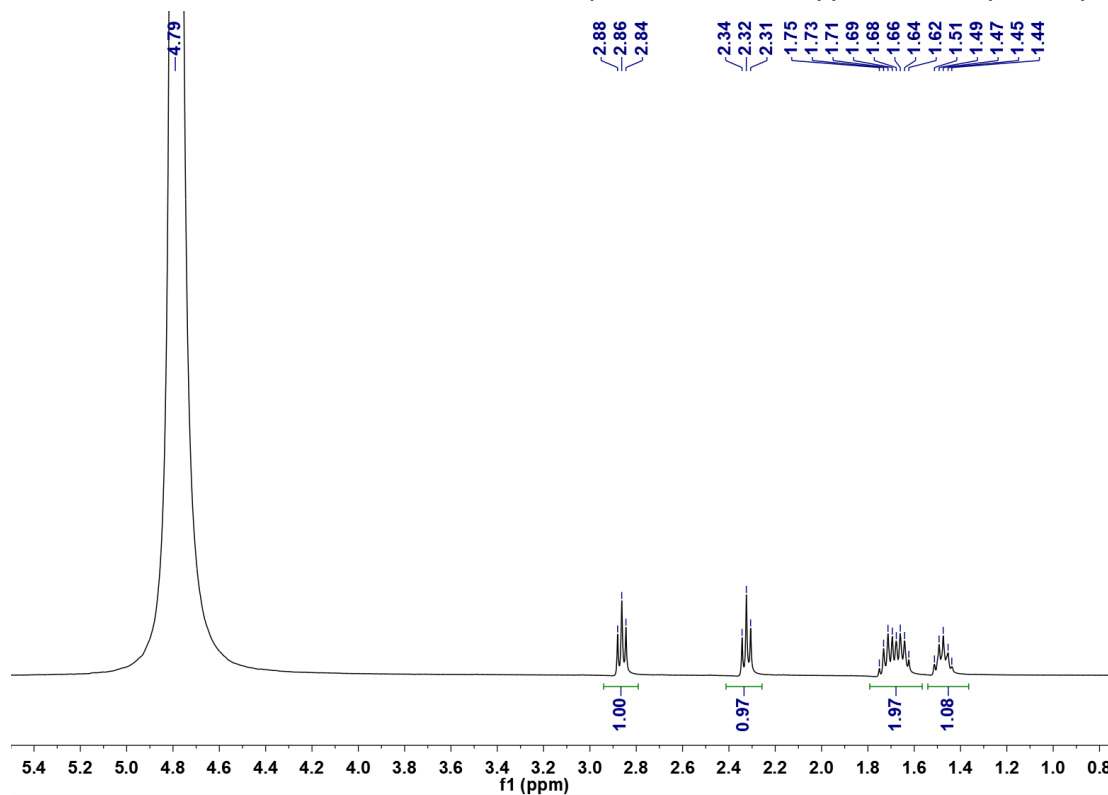

Figure S13. <sup>1</sup>H NMR spectrum of commercial 6-aminocaproic acid in NH<sub>3</sub>·H<sub>2</sub>O (D<sub>2</sub>O as solvent, 4.79 ppm; room temperature).

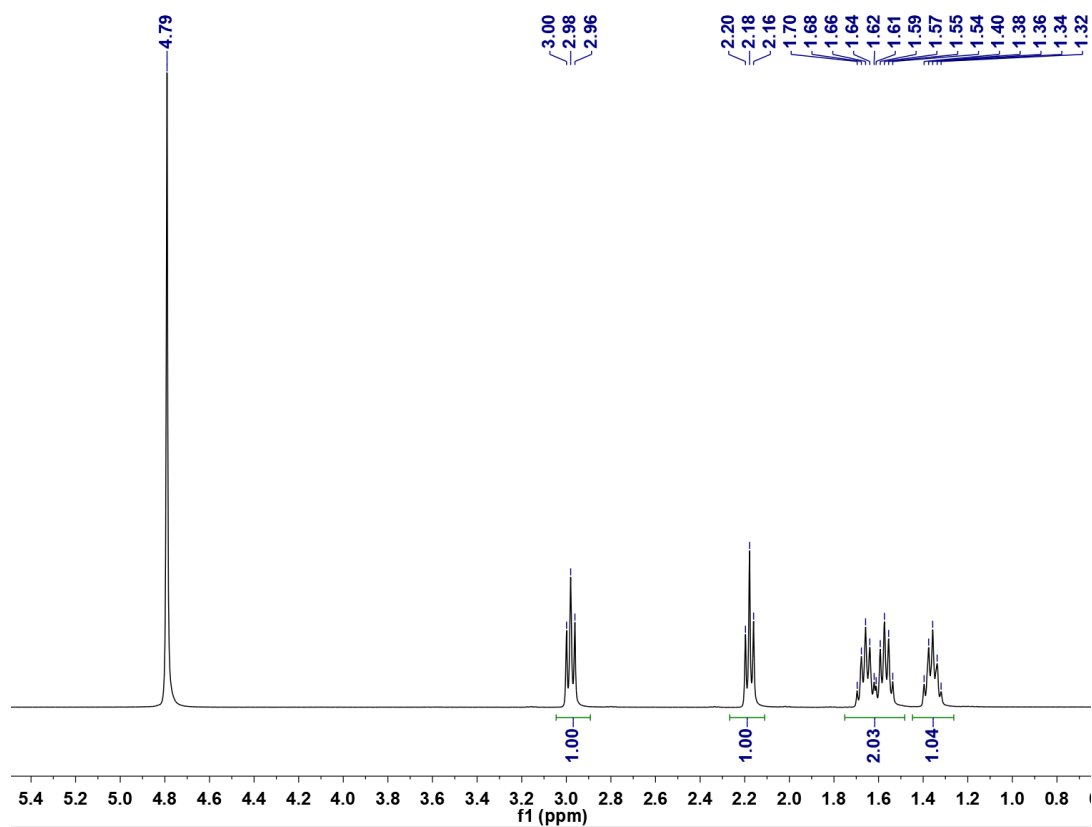

Figure S14. <sup>1</sup>H NMR spectrum of commercial 6-aminocaproic acid (D<sub>2</sub>O as solvent, 4.79 ppm; room temperature).

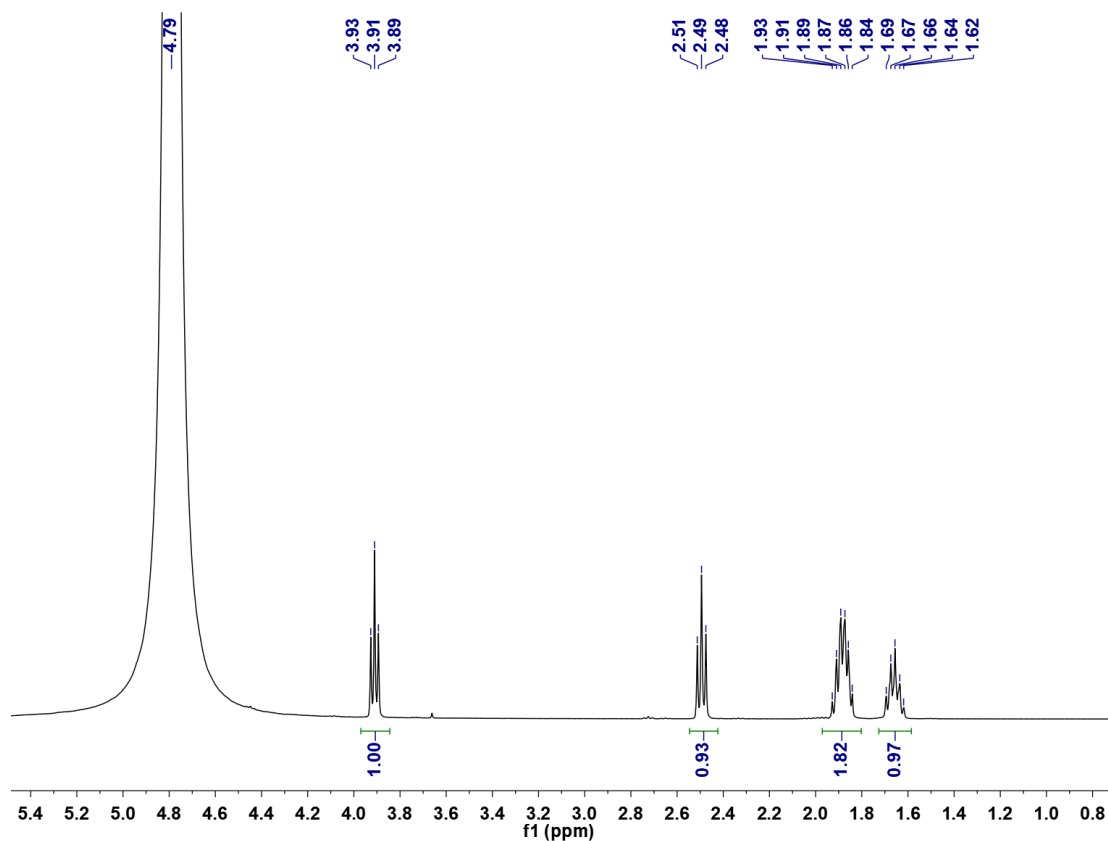

Figure S15. <sup>1</sup>H NMR spectrum of commercial 6-hydroxyhexanoic acid in NH<sub>3</sub><sup>+</sup> H<sub>2</sub>O (D<sub>2</sub>O as solvent, 4.79 ppm; room temperature).

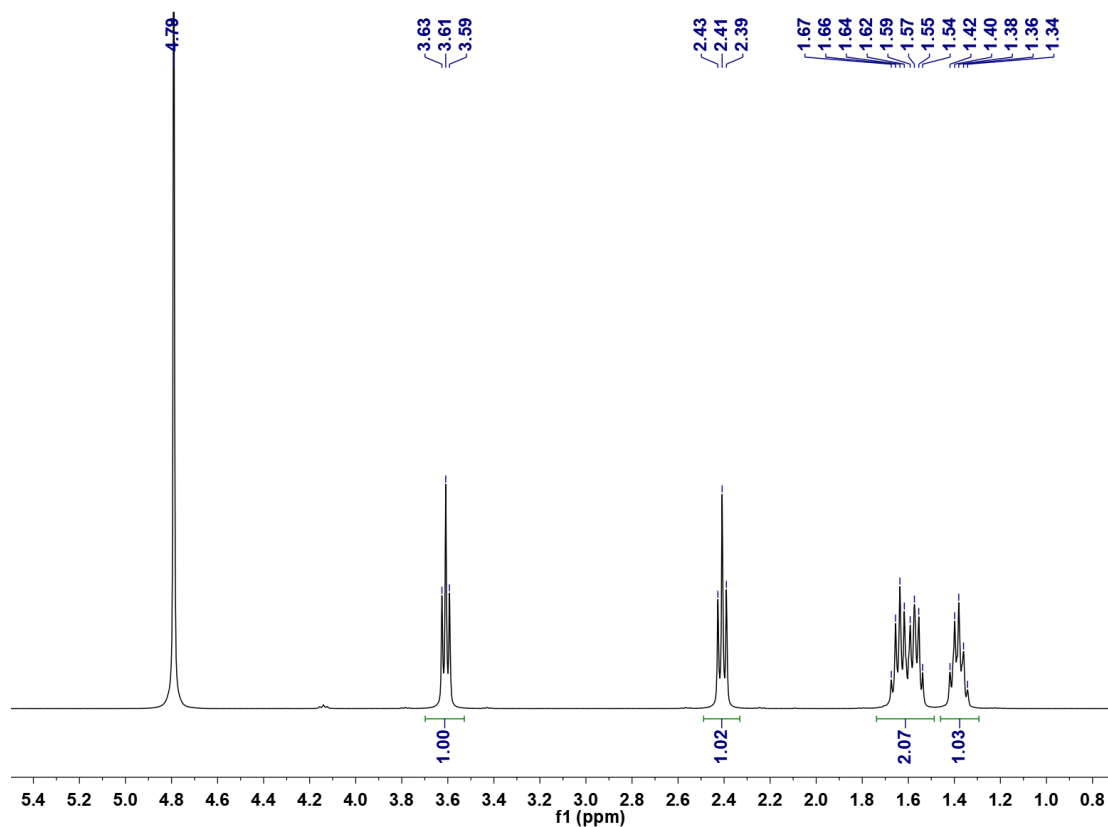

Figure S16. <sup>1</sup>H NMR spectrum of commercial 6-hydroxyhexanoic acid (D<sub>2</sub>O as solvent, 4.79 ppm; room temperature).

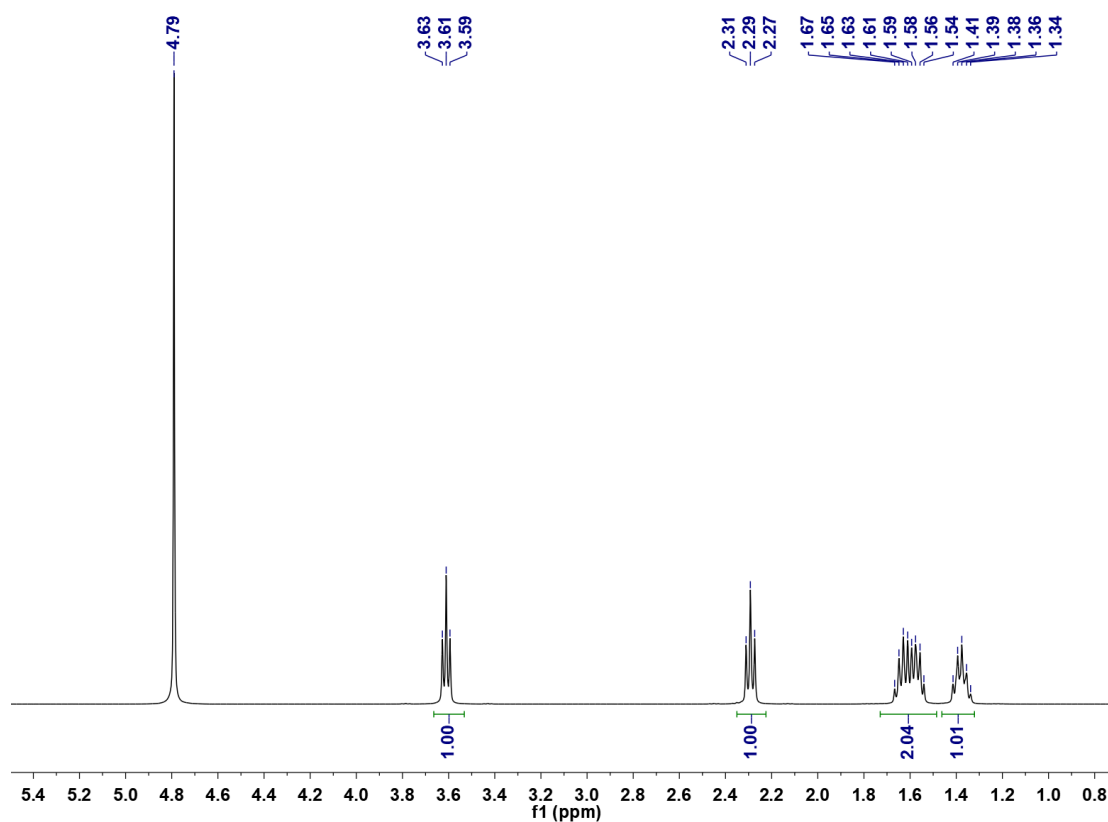

Figure S17. <sup>1</sup>H NMR spectrum of commercial 6-hydroxyhexanamide (D<sub>2</sub>O as solvent, 4.79 ppm; room temperature).

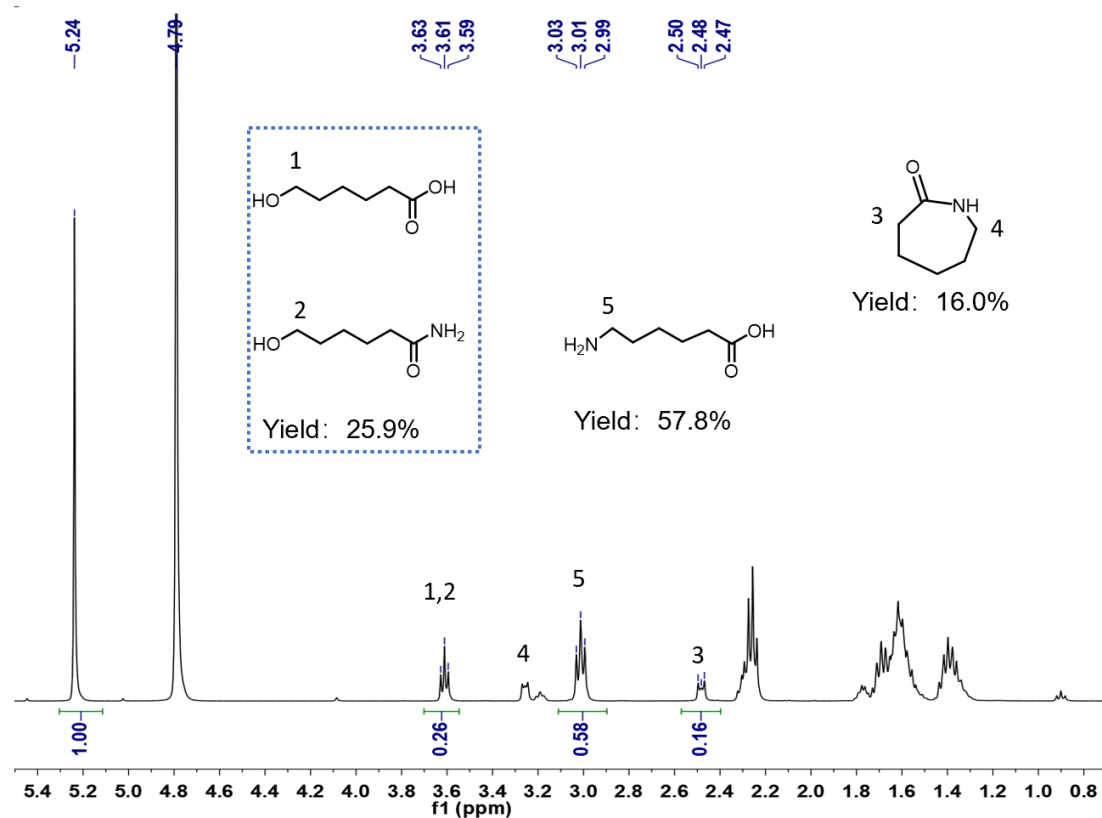

**Figure S18.**  $^1\text{H}$  NMR spectrum of the reaction solution of PCL decomposition after spin evaporation treatment (s-trioxane as internal standard, 5.24 ppm;  $\text{D}_2\text{O}$  as solvent, 4.79 ppm; room temperature). Reaction conditions: PCL, 1 mmol; Ru/CeO<sub>2</sub>, 50 mg;  $\text{NH}_3\cdot\text{H}_2\text{O}$ , 3 mL; 140 °C, 72h.

Note: From the  $^1\text{H}$  NMR spectrum, it is clear that 6-hydroxyhexanamide, 6-hydroxyhexanoic acid, 6-aminocaproic acid and caprolactam coexisted in the reaction solution.

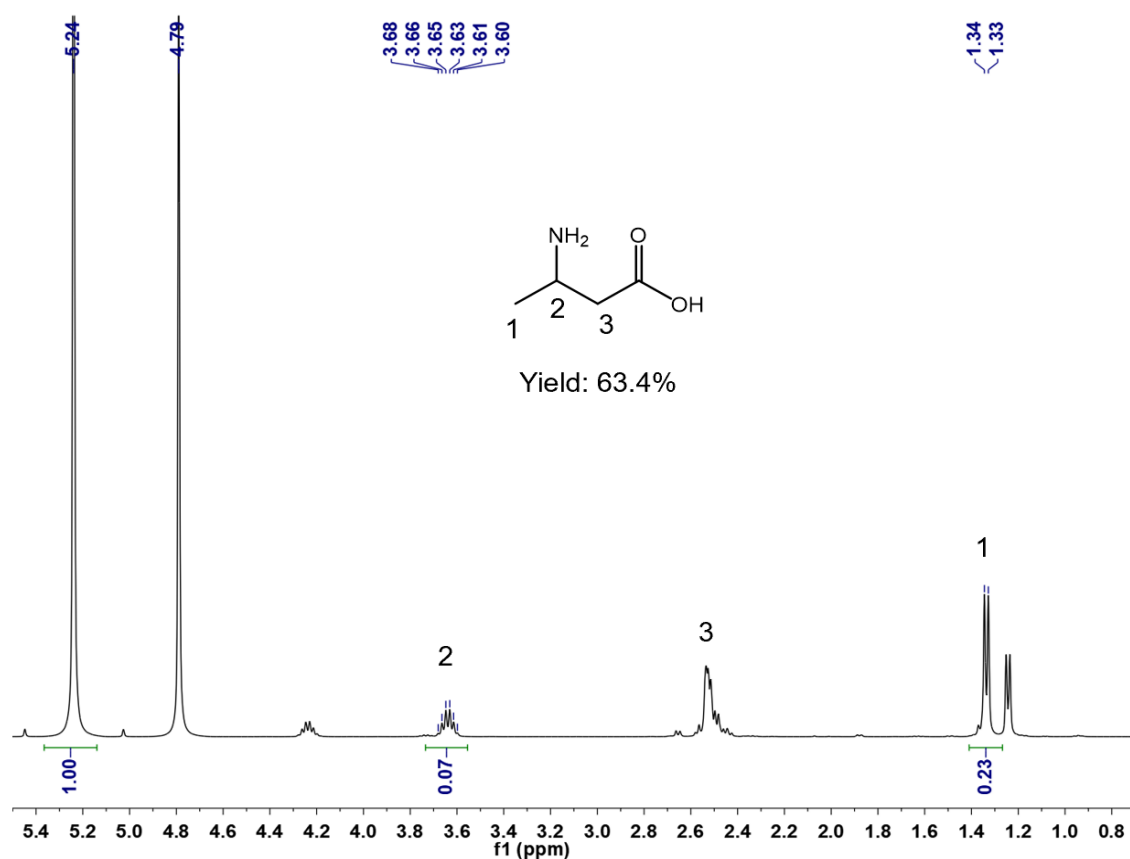

**Figure S19.** <sup>1</sup>H NMR spectrum of the reaction solution of PHB decomposition after spin evaporation treatment (s-trioxane as internal standard, 5.24 ppm; D<sub>2</sub>O as solvent, 4.79 ppm; room temperature). Reaction conditions: PHB, 0.2 mmol; Ru/CeO<sub>2</sub>/RGO, 10 mg; NH<sub>3</sub>·H<sub>2</sub>O, 1mL; 140 °C, 18h.

Note: From the <sup>1</sup>H NMR spectrum, it is clear that 3-amino butanoic acid was generated in the reaction solution.

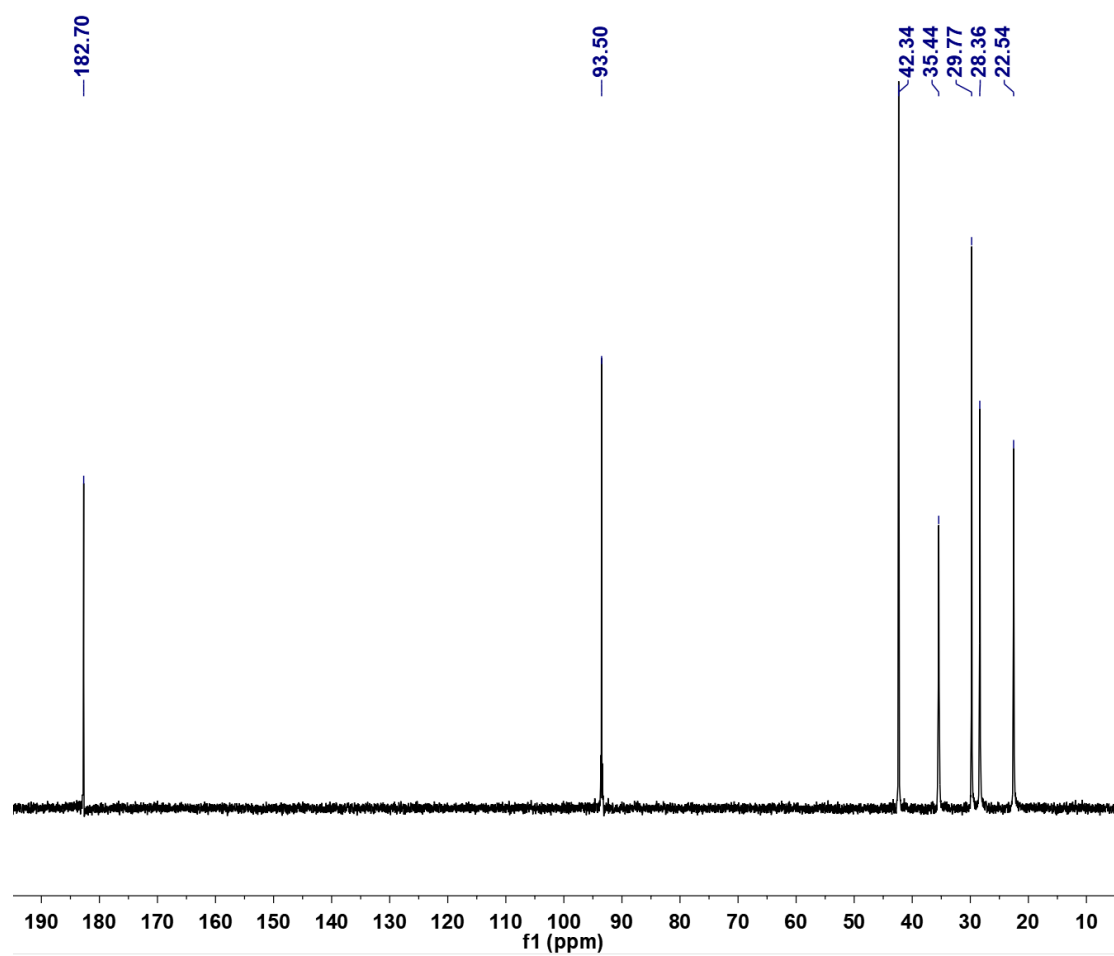

Figure S20.  $^{13}\text{C}$  NMR spectrum of commercial caprolactam (s-trioxane as internal standard, 93.50 ppm;  $\text{D}_2\text{O}$  as solvent; room temperature).

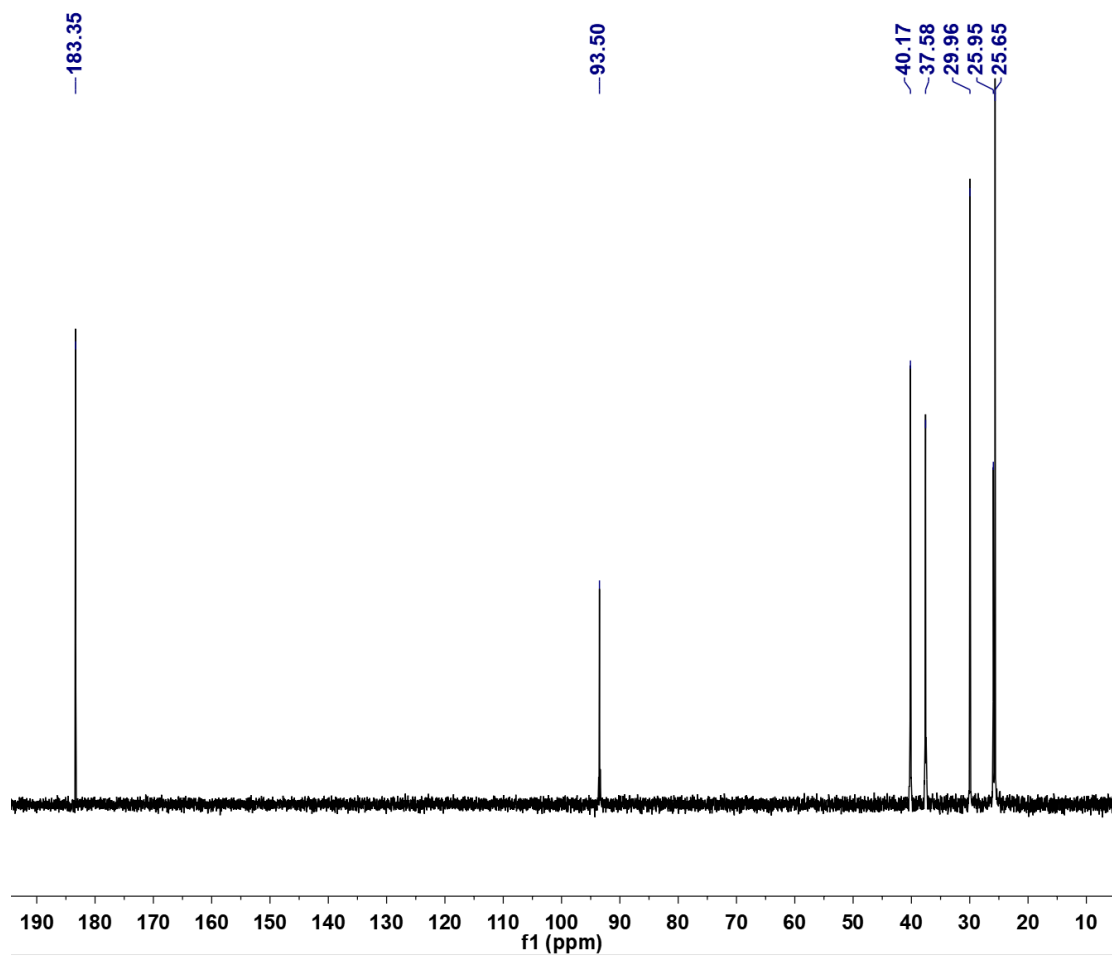

Figure S21.  $^{13}\text{C}$  NMR spectrum of commercial 6-aminocaproic acid in  $\text{NH}_3 \cdot \text{H}_2\text{O}$  (s-trioxane as internal standard, 93.50 ppm;  $\text{D}_2\text{O}$  as solvent; room temperature).

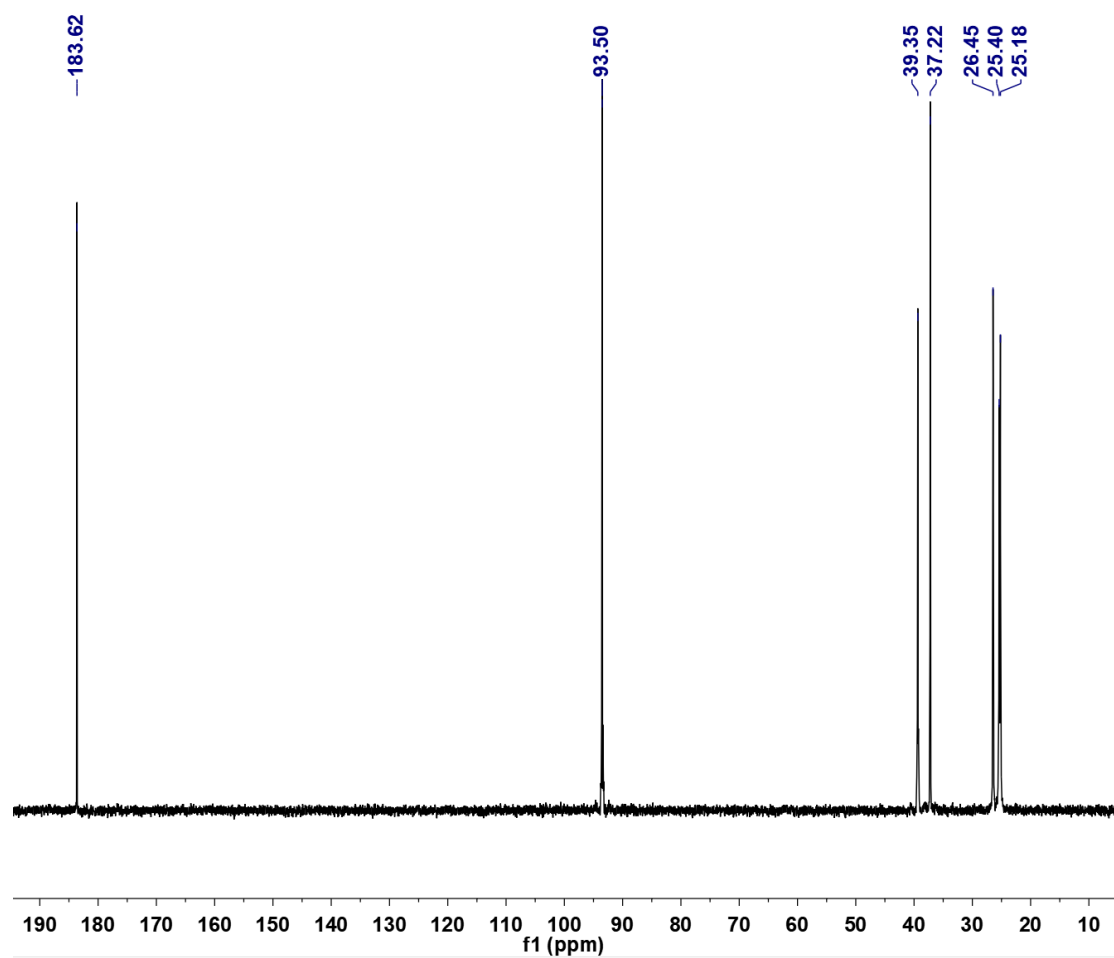

Figure S22.  $^{13}\text{C}$  NMR spectrum of commercial 6-aminocaproic acid (s-trioxane as internal standard, 93.50 ppm;  $\text{D}_2\text{O}$  as solvent; room temperature).

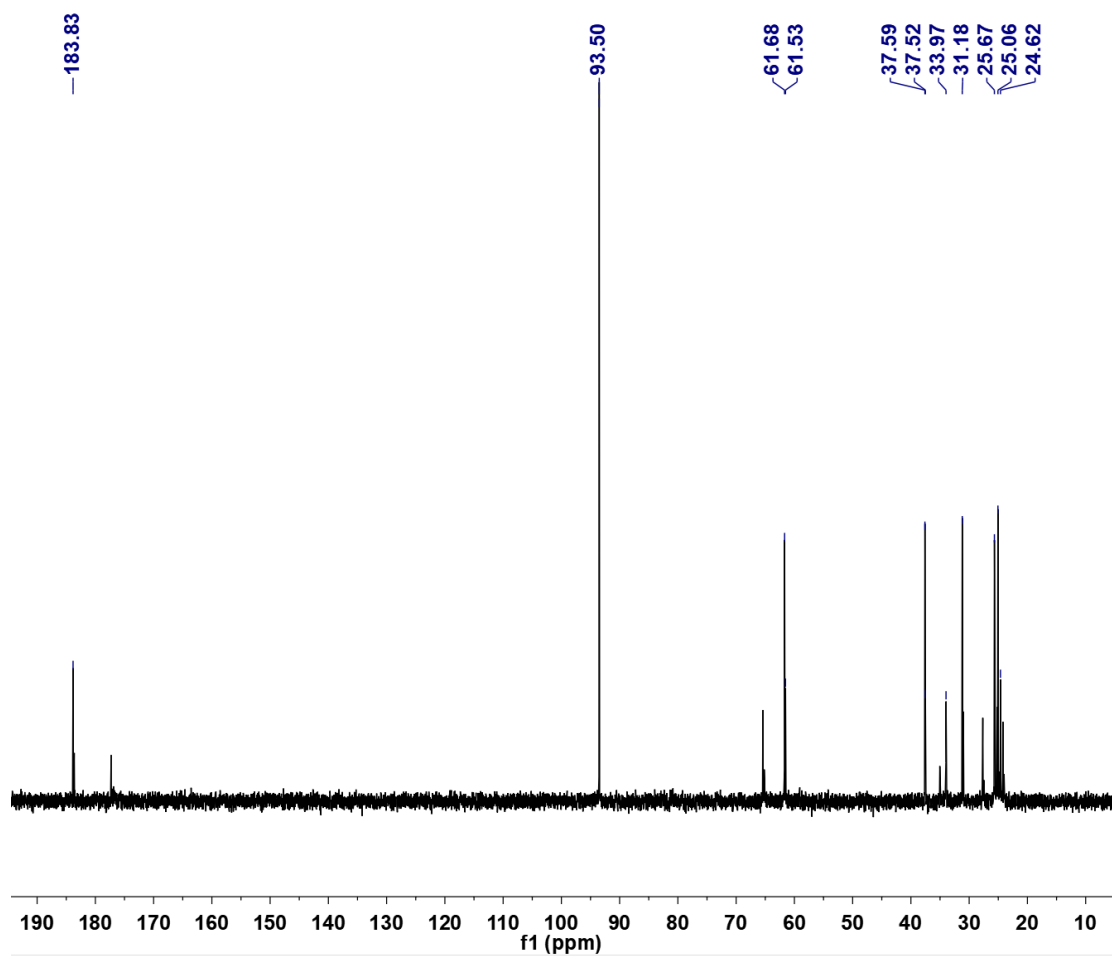

Figure S23.  $^{13}\text{C}$  NMR spectrum of commercial 6-hydroxyhexanoic acid in  $\text{NH}_3^+ \text{H}_2\text{O}$  (s-trioxane as internal standard, 93.50 ppm;  $\text{D}_2\text{O}$  as solvent; room temperature).

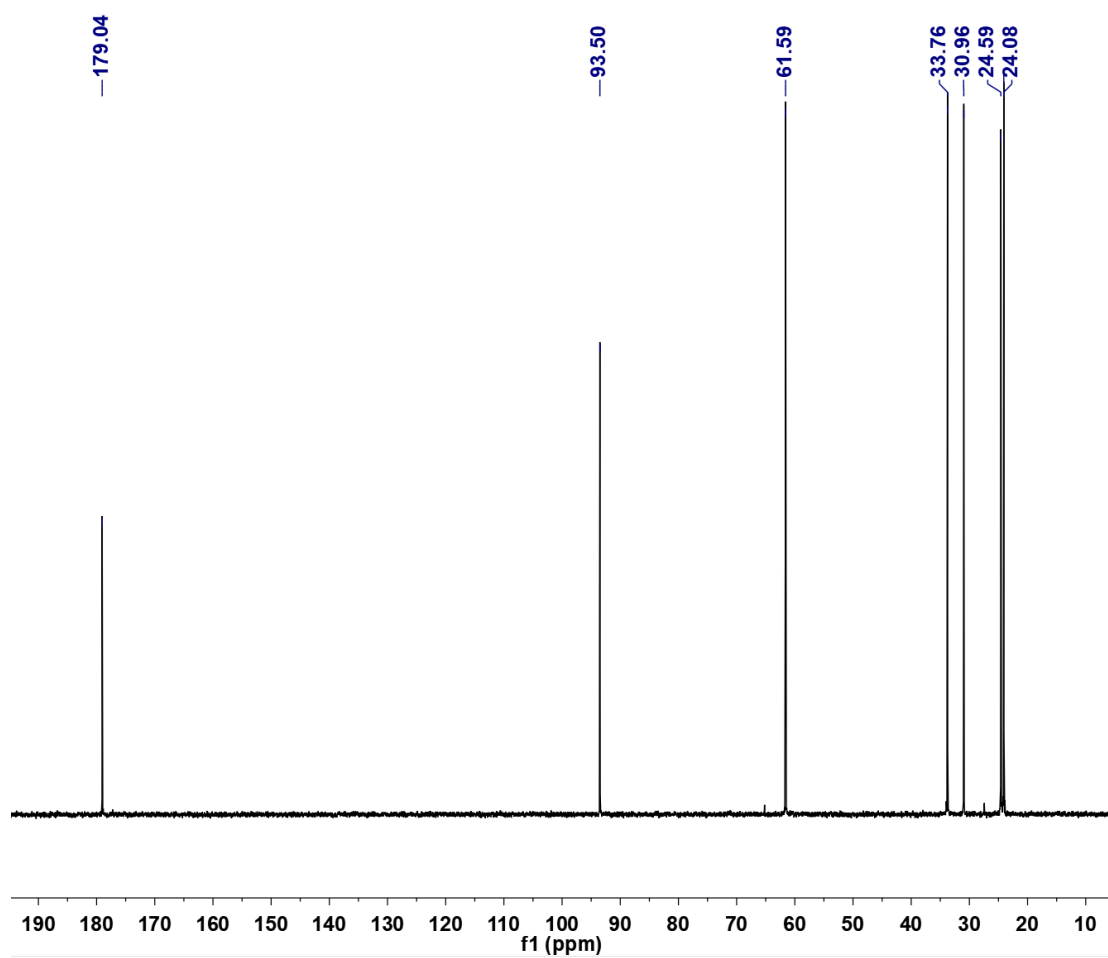

Figure S24.  $^{13}\text{C}$  NMR spectrum of commercial 6-hydroxyhexanoic acid (s-trioxane as internal standard, 93.50 ppm;  $\text{D}_2\text{O}$  as solvent; room temperature).

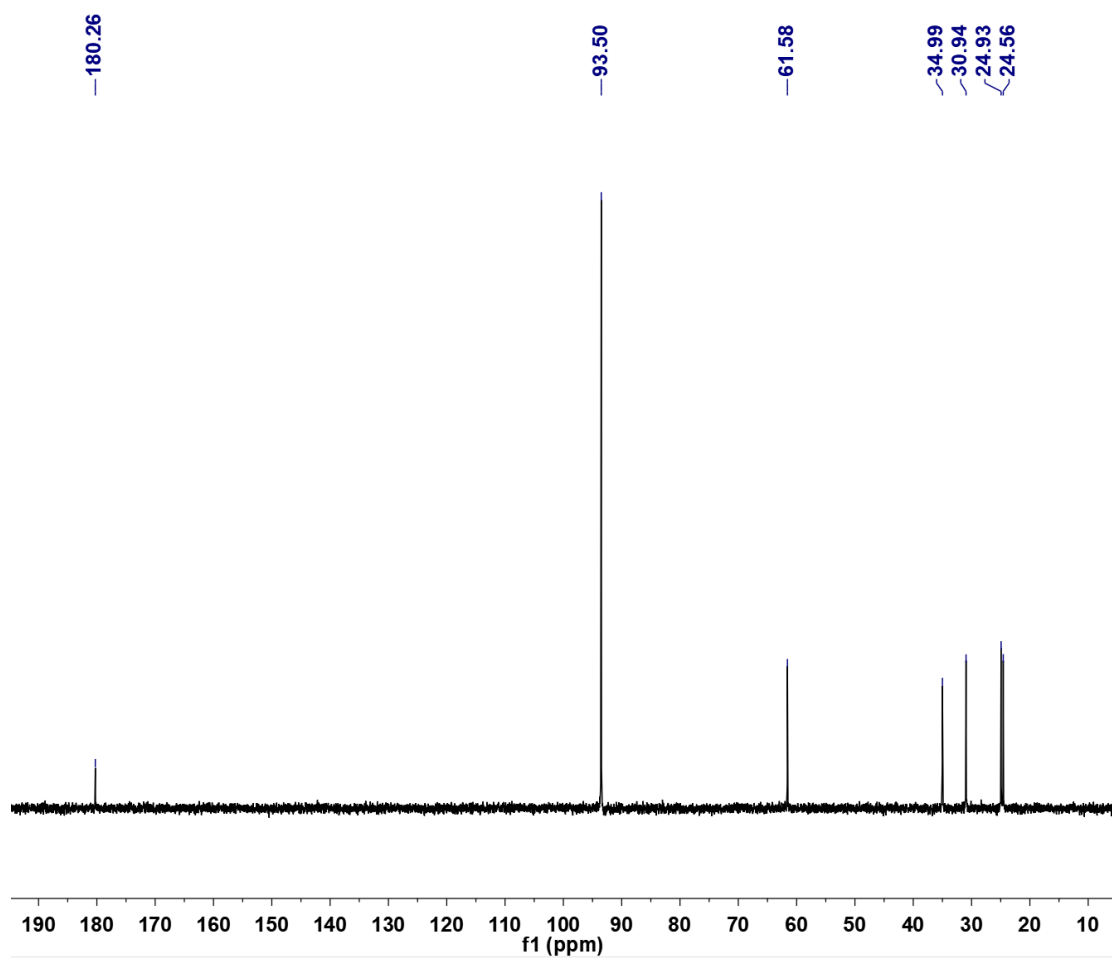

Figure S25.  $^{13}\text{C}$  NMR spectrum of commercial 6-hydroxyhexanamide (s-trioxane as internal standard, 93.50 ppm;  $\text{D}_2\text{O}$  as solvent; room temperature).

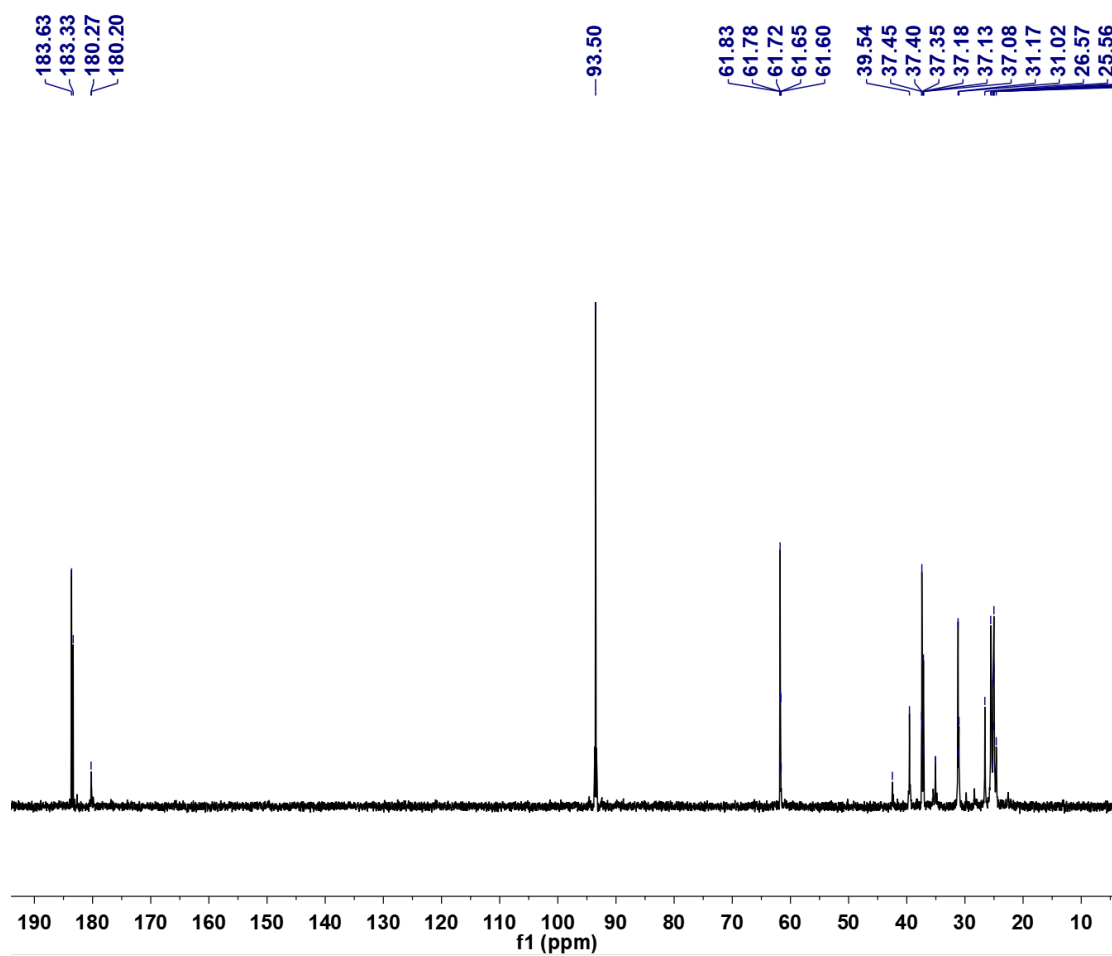

**Figure S26.**  $^{13}\text{C}$  NMR spectrum of the reaction solution of PCL decomposition after spin evaporation treatment (s-trioxane as internal standard, 93.50 ppm;  $\text{D}_2\text{O}$  as solvent; room temperature). Reaction conditions: PCL, 1 mmol; Ru/CeO<sub>2</sub>, 50 mg;  $\text{NH}_3\cdot\text{H}_2\text{O}$ , 3 mL; 140 °C, 18 h.
